# Supplementary material for: Evaluation of putative reference genes for quantitative real-time PCR normalization in Lilium regale during development and under stress
Source: PeerJ. 2016 Mar 21;4:e1837. doi: 10.7717/peerj.1837 (PMC4806604; doi:10.7717/peerj.1837)
Supplement: Supplemental Information 5 [file peerj-04-1837-s005.xlsx]

## Sheet: Cq Values
	ACT	BHLH	CLA	CYP	EF	GAPDH	SAND	TIP41	18S rRNA
Inoculation-2H	20.3903	20.7301	20.7309	18.4825	19.3495	16.9209	22.2227	20.4571	21.7278
Inoculation-6H	20.8144	20.9967	20.7928	20.02	19.4467	17.9488	22.3484	21.867	20.7031
Inoculation-12H	21.635	21.3027	21.7781	21.0905	20.2868	17.9434	23.4127	22.9121	21.0601
Inoculation-24H	20.5489	21.146	21.3143	20.2726	19.5906	17.4117	22.904	22.1444	21.0193
Inoculation-36H	21.295	20.7773	21.5154	20.5532	19.7772	18.3109	23.2216	22.4567	20.9724
Inoculation-48H	20.7604	20.7722	21.4268	20.5775	19.3378	18.0346	23.0017	22.4485	20.5259
Cold-2H	21.9185	21.6666	23.0307	20.0468	18.8894	17.7686	24.0453	22.387	21.75
Cold-6H	21.6721	22.7248	22.1233	20.488	19.1124	17.8578	24.5584	22.328	22.3358
Cold-12H	20.2311	21.3324	21.2874	19.6918	18.4509	17.3258	23.1532	21.6386	21.9794
Cold-24H	19.9484	21.6287	21.7196	19.336	19.032	17.0116	23.0064	21.559	21.9664
Cold-36H	20.3534	20.6603	20.6917	19.3323	19.2961	16.5212	22.8288	20.9402	22.1802
Cold-48H	20.1831	22.4878	22.0799	19.9371	19.385	17.2056	23.2865	21.3975	22.1448
Hot-2H	21.6336	22.7363	23.5605	19.8326	20.1423	18.5683	25.0223	23.1612	23.2702
Hot-6H	20.9596	21.7574	22.5994	19.1568	19.546	18.4413	24.6349	23.3576	23.1126
Hot-12H	21.0033	21.8778	23.436	19.5837	20.3804	18.7121	25.424	23.2504	23.3177
Hot-24H	19.993	23.5494	22.5769	19.4418	19.9559	18.8446	25.2095	22.6869	22.7859
Hot-36H	20.5751	22.0077	21.9686	19.0067	19.96	18.8271	24.9458	22.1281	20.8485
Hot-48H	20.3429	21.9659	22.3111	19.3618	20.047	19.0138	25.9128	22.7668	21.0096
Salinity-2H	23.5924	23.2534	23.8509	20.2731	20.4963	19.1677	25.7686	23.9391	23.7553
Salinity-6H	21.1367	21.9907	22.2309	20.0242	19.5118	18.1578	23.5679	22.588	22.8137
Salinity-12H	22.4603	22.6963	23.2431	21.4383	20.1018	18.8953	24.8676	23.6708	22.771
Salinity-24H	20.0452	21.7982	22.2928	19.1779	18.7107	17.3361	24.2866	22.3891	22.3364
Salinity-36H	21.1415	21.7283	22.3445	19.3619	19.0737	17.4824	24.8025	22.352	23.275
Salinity-48H	21.425	22.1356	22.5104	19.3617	19.3906	17.7132	24.4276	22.7518	22.0397
Drought-2D	27.246	24.2204	23.0731	25.6413	21.4536	22.4095	25.9671	27.2583	21.8171
Drought-3D	26.1495	24.2203	23.7576	24.8705	21.2971	22.1745	25.3167	26.6839	21.6311
Drought-4D	25.9358	24.5391	23.2361	25.0377	21.4798	22.3404	25.6798	26.2959	21.4756
Drought-6D	26.6359	24.3228	23.0576	25.3532	22.0198	22.9331	26.1342	26.68	21.7891
Drought-8D	26.7361	25.1226	24.2966	26.0935	21.6358	23.518	26.9675	27.3677	21.9802
Development-1M	21.2774	22.6031	21.2195	19.1152	20.8117	18.9457	24.6254	22.286	20.3165
Development-2M	21.8824	22.4745	21.3614	20.0564	20.3218	17.9942	24.3926	22.1172	20.6638
Development-3M	22.1426	22.7713	22.0486	19.3987	20.124	18.2653	23.9708	22.2934	22.2785
Development-4M	26.9558	24.8754	24.21	27.7558	23.9384	23.3446	27.8629	26.3495	24.5852
Development-5M	24.4644	21.9796	21.9664	26.6281	21.7179	20.7884	25.2247	24.1053	23.5497
Development-6M	23.5439	22.1527	21.6924	23.1534	21.1424	20.9627	25.0579	23.7282	22.2254
Inoculation-2H	20.1398	20.3983	20.4767	18.3267	19.3459	16.7841	22.175	20.394	21.5466
Inoculation-6H	20.7626	20.8022	20.6432	19.9551	19.3287	17.7345	22.2146	21.5486	20.6983
Inoculation-12H	21.1707	21.2932	21.6196	21.0833	20.2429	17.8202	23.2576	22.6743	20.7193
Inoculation-24H	20.4824	21.0461	21.2129	20.2038	19.4569	17.377	22.8776	22.0667	20.7177
Inoculation-36H	21.2123	20.5513	21.4377	20.2732	19.6097	18.0181	23.0544	22.2909	20.9095
Inoculation-48H	20.7149	20.5355	21.3313	20.3925	19.2877	17.9439	22.7741	22.2292	20.2455
Cold-2H	21.6341	21.5651	22.9875	19.9347	18.771	17.6558	23.9484	22.3529	21.557
Cold-6H	20.9135	22.5353	22.0399	20.4409	19.0448	17.6041	23.433	22.0497	22.1425
Cold-12H	20.0828	21.3207	21.2123	19.3914	18.3461	17.1657	23.0836	21.5265	21.525
Cold-24H	19.8585	21.4895	21.6433	19.1235	18.8521	16.7017	22.8384	21.4914	21.6259
Cold-36H	20.2478	20.375	20.5753	19.0623	18.4923	16.2252	22.6872	20.7443	22.1466
Cold-48H	20.0925	22.3075	21.5237	19.8577	19.083	16.9635	23.102	21.2211	22.1292
Hot-2H	21.063	22.6954	23.5158	19.6247	20.0543	18.4457	25.0148	23.0375	23.1617
Hot-6H	20.5932	21.5003	22.5984	19.0332	19.3659	18.408	24.5042	22.8446	22.9744
Hot-12H	20.6947	21.6769	23.2934	19.4973	19.5438	18.629	25.3794	23.0906	23.2747
Hot-24H	19.8069	22.9879	22.4573	19.3221	19.7977	18.5041	25.1037	22.3901	22.7508
Hot-36H	20.5464	21.9116	21.7606	18.9794	19.8143	18.6175	24.4032	21.9591	20.5543
Hot-48H	20.2566	21.7132	22.1291	19.2568	19.92	18.5864	25.6651	22.5486	20.8627
Salinity-2H	23.5557	23.2102	23.5569	20.0846	20.3808	18.9033	25.5545	23.8576	23.5618
Salinity-6H	21.0743	21.8252	21.9967	19.8564	19.3718	17.8473	23.5268	22.25	22.6163
Salinity-12H	22.3963	22.5879	23.196	21.1654	19.921	18.5611	24.5717	23.5775	22.4851
Salinity-24H	19.7509	21.546	22.065	19.0463	18.4326	17.2689	23.8911	22.2089	22.3297
Salinity-36H	21.0568	21.4923	22.2671	19.2909	19.0271	17.3895	23.584	22.2488	23.172
Salinity-48H	21.3673	22.0923	22.4536	19.1537	19.1454	17.5356	24.2774	22.5233	21.8996
Drought-2D	27.0813	24.0146	22.8857	25.3392	21.4104	22.1931	25.9461	27.1358	21.7498
Drought-3D	25.8674	24.2194	23.4759	24.5314	21.276	22.1216	24.9722	26.2691	21.5525
Drought-4D	25.7011	24.359	23.1134	24.9921	21.2755	21.7469	25.2921	26.0639	21.3856
Drought-6D	26.5742	24.3198	22.9276	25.1125	21.9647	22.6571	26.098	26.5359	21.6833
Drought-8D	26.5759	25.0864	24.0444	25.8695	21.4761	22.9941	26.9228	27.2999	21.795
Development-1M	21.0085	22.4145	21.0927	18.9034	20.676	18.3728	24.5719	22.2119	20.1086
Development-2M	21.6421	22.3953	21.3029	19.6971	20.2127	17.77	24.066	21.9254	20.6248
Development-3M	21.8329	22.5785	22.0307	19.1927	19.8717	17.9408	23.8156	22.1189	22.0711
Development-4M	26.7426	24.805	23.9457	27.5424	23.639	23.2255	27.7842	26.3258	24.2304
Development-5M	24.4099	21.6826	21.7982	26.5241	21.6178	20.4582	25.0985	23.8987	23.0095
Development-6M	23.3812	22.0908	21.6139	23.0388	20.8795	20.787	24.9012	23.6362	21.3257
